# Supplementary material
Source: MDPI journal article supplement (https://www.mdpi.com/1996-1073/14/3/787)
Supplement: s1 [file s1]

Supplementary Material

# Improving the Anaerobic Digestion of Swine Manure through an Optimized Ammonia Treatment: Process Performance, Digestate and Techno-Economic Aspects

Anna Lymperatou <sup>1</sup>, Niels B. Rasmussen <sup>2</sup>, Hariklia N. Gavala <sup>1</sup> and Ioannis V. Skiadas <sup>1,\*</sup>

<sup>1</sup> Department of Chemical and Biochemical Engineering, Technical University of Denmark, Søtofts Plads 228A, 2800 Kgs. Lyngby, Denmark; alym@kt.dtu.dk (A.L.); hnga@kt.dtu.dk (H.N.G.)

<sup>2</sup> Danish Gas Technology Centre, Dr. Neergaards Vej 5B, Hørsholm 2970, Denmark; nbr@dgc.dk

\* Correspondence: ivsk@kt.dtu.dk or Ioannis\_sk@yahoo.co.uk

## S.1 Theoretical calculations of CH<sub>4</sub> yields of NP and AAS digesters based on BMP tests

Assuming that the hydrolysis is the limiting step of the AD, the hydrolysis constants,  $k_h$ , of manure fibers (NP and AAS) were calculated by equation S1. The conditions and set up of the BMP tests can be found in Lymperatou et al. [14].

$$B = B_0 * (1 - e^{-k_h t}) \quad (S1)$$

where:  $B$ , the CH<sub>4</sub> yield after  $t$  days of digestion in mL/g TS;  $B_0$ , the ultimate CH<sub>4</sub> yield in mL/g TS;  $k_h$ , hydrolysis constant; and  $t$ , the duration of digestion in d.

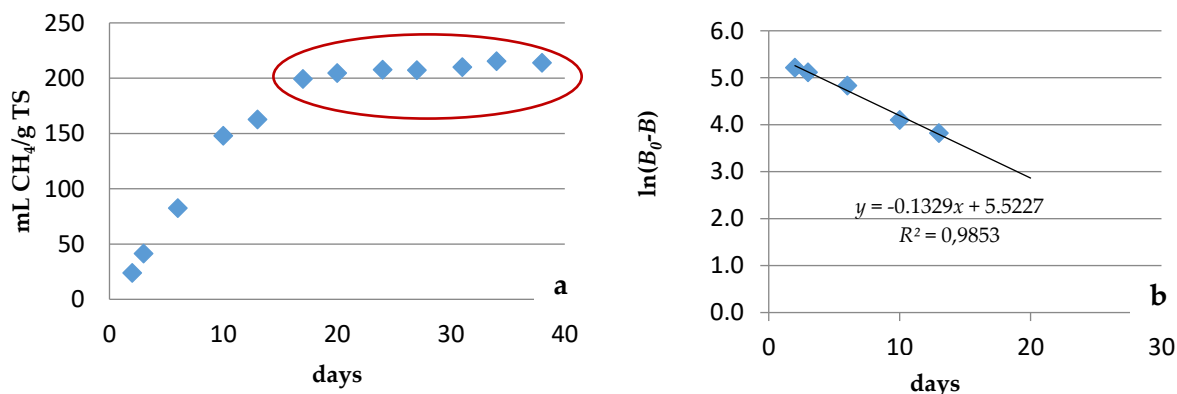

**Figure 1.** BMP tests of optimally AAS-treated manure fibers: (a) Evolution of cumulative CH<sub>4</sub> yield [14]; (b) Hydrolysis constant determination by Equation S1 from BMP test.

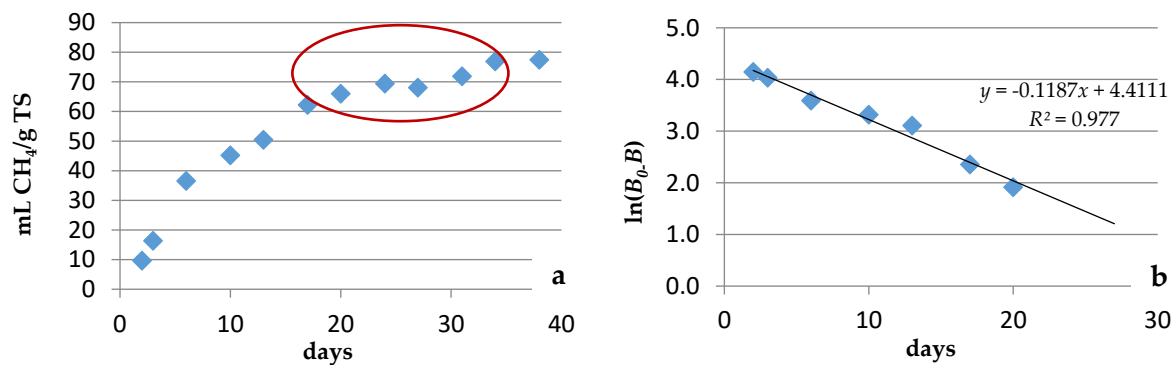

**Figure 2.** BMP tests of optimally NP manure fibers: (a) Evolution of cumulative CH<sub>4</sub> yield of NP manure fibers [14]; (b) Hydrolysis constant determination by Equation S1 from BMP test.

**Table S1.** Ultimate CH<sub>4</sub> yield ( $B_0$ ) and hydrolysis constant ( $k_h$ ) of NP and AAS manure fibers as resulted from equation S1.

| Substrate  | $B_0$  | $k_h$  |
|------------|--------|--------|
| NP fibers  | 72.72  | 0.1187 |
| AAS fibers | 208.34 | 0.1329 |

Based on the  $k_h$  (Table S1), the expected CH<sub>4</sub> yields of the NP and AAS fibers were calculated at the respective SRT of each digester (NP and AAS) from the continuous experiments based on Equation 5. The data are presented in Table S2.

**Table 2.** CH<sub>4</sub> yield of NP fibers and AAS fibers (without manure) calculated by Equation 5 in original paper.

| Substrate  | $B$ | $B_0$ | $k_h$  | $t$ (SRT) |
|------------|-----|-------|--------|-----------|
| NP fibers  | 55  | 72    | 0.1187 | 26.7      |
| AAS fibers | 161 | 208   | 0.1329 | 25.9      |

Finally, assuming that the CH<sub>4</sub> yield of manure in the NP and AAS digester corresponded to 204 mL/g TS (average CH<sub>4</sub> yield of the Reference digester), and given the TS ratio of manure: fibers in the NP and AAS digesters corresponded to 2:1, the CH<sub>4</sub> yield of the NP and AAS digester were calculated to be 151 mL/g and 189 mL/g TS, respectively (Table S3).

**Table S3.** Expected CH<sub>4</sub> yield of NP and AAS digesters based on the share of substrate.

| Digester     | mL CH <sub>4</sub> /g TS manure | mL CH <sub>4</sub> /g TS fibers | g TS manure/g TS fibers | Expected mLCH <sub>4</sub> /g TS |
|--------------|---------------------------------|---------------------------------|-------------------------|----------------------------------|
| NP digester  | 204                             | 55                              | 2/1                     | 151                              |
| AAS digester | 204                             | 161                             | 2/1                     | 189                              |

## S.2 Calculations of biogas output of AD of solely manure (scenario 1) and AD of manure enriched with NP fibers (scenario 2) for comparison to the simulation

**Table S4.** Characteristics of Scenario 1 (manure mono-digestion) and Scenario 2 (AD of manure and NP fibers).

| Characteristic.                                   | Scenario 1 (10kg manure) | Scenario 2 (10kg manure + 3kg NP fibers) |
|---------------------------------------------------|--------------------------|------------------------------------------|
| HRT                                               | 20                       | 20                                       |
| Kg TS manure/h                                    | 0.6                      | 0.6                                      |
| Kg TS fibers/h                                    | -                        | 0.9                                      |
| mL CH <sub>4</sub> / gTS from manure              | 212                      | 212                                      |
| mL CH <sub>4</sub> / gTS from fibers <sup>1</sup> | -                        | 51.2                                     |
| L CH <sub>4</sub> /h from manure                  | 127.2                    | 127.2                                    |
| L CH <sub>4</sub> /h from fibers <sup>1</sup>     | -                        | 46.1                                     |
| Total L CH <sub>4</sub> /h                        | 127.2                    | 173.3                                    |
| Kg CH <sub>4</sub> /h                             | 0.0913                   | 0.1243                                   |

<sup>1</sup>Calculated based on eq.5 for  $t = 20$ .

Based on the calculations presented in Table S4, Scenario 1 results in 0.0913 kg CH<sub>4</sub>/h and Scenario 2 results in 0.1243 kg CH<sub>4</sub>/h. The estimation of CH<sub>4</sub> production for Scenario 3 (manure + AAS fibers) from the HYSYS simulation resulted in 0.2140 kg CH<sub>4</sub>/h. Thus, the resulted increase of CH<sub>4</sub> production in Scenario 3 corresponds to 135% as compared to Scenario 1 and 72% as compared to Scenario 2.

## S.3 Preliminary results of BMP tests for evaluating the efficiency of AAS at low temperature and efficiency of AAS with the addition of centrifuged effluent instead of water

**Table S5.** Increase of CH<sub>4</sub> yield achieved from BMPs of digested manure fibers for evaluating the efficiency of AAS at low temperature and with the addition of centrifuged effluent.

| Experiment <sup>1</sup> | AAS conditions                              | BMP duration (days) | % increase CH <sub>4</sub> yield <sup>2</sup> |
|-------------------------|---------------------------------------------|---------------------|-----------------------------------------------|
| AAS Effluent            | 5% w/w NH <sub>3</sub> , 3 days, 0.16kg/L   | 29                  | +261                                          |
| AAS tap water           | 5% w/w NH <sub>3</sub> , 3 days, 0.16kg/L   | 29                  | +247                                          |
| AAS miliQ water         | 5% w/w NH <sub>3</sub> , 3 days, 0.16kg/L   | 29                  | +244                                          |
| AAS ambient temperature | 5% w/w NH <sub>3</sub> , 2.5 days, 0.33kg/L | 23                  | +57                                           |
| AAS 4°C                 | 5% w/w NH <sub>3</sub> , 2.5 days, 0.33kg/L | 23                  | +56                                           |

<sup>1</sup> AAS-Effluent, AAS-tap water and AAS miliQ water correspond to AAS-treated digested fibers diluted with centrifuged AD effluent, tap water and miliQ water prior to NH<sub>3</sub> removal respectively and before BMP tests. <sup>2</sup> As compared to the CH<sub>4</sub> yield of NP digested manure fibers.
